# Supplementary material for: A series of polyoxometalate-based COF composites by one-pot mechanosynthesis of thioether to sulfone
Source: Royal Society of Chemistry journal article supplement (doi:10.1039/d3dt02116e), 2023-01-01
Supplement: d3dt02116e1.pdf [file d3dt02116e1.pdf]

Supporting Information for

**A Series of Polyoxometalates–Based COF Composites by One–Pot  
Mechanosynthesis for Thioether to Sulfone**

Yanyan Guo, Xiaohui Liu, Xiaodong Liu, Na Xu,\* Xiuli Wang\*

*College of Chemistry and Materials Engineering, Bohai University, Liaoning  
Professional Technology Innovation Center of Liaoning Province for Conversion  
Materials of Solar Cell, Jinzhou 121013, P. R. China*

## Table of Contents

|                                                                                                                                                                                                                                                                        |    |
|------------------------------------------------------------------------------------------------------------------------------------------------------------------------------------------------------------------------------------------------------------------------|----|
| <b>Table of Contents</b> .....                                                                                                                                                                                                                                         | 2  |
| <b>Experimental section</b> .....                                                                                                                                                                                                                                      | 4  |
| <b>Fig. S1</b> Schematic illustration for the syntheses of POMs@TpPa-1. ....                                                                                                                                                                                           | 4  |
| <b>Fig. S2</b> (a) The pictures of TpPa-1; (b) PW <sub>12</sub> @TpPa-1; (c) PMo <sub>12</sub> @TpPa-1. ....                                                                                                                                                           | 4  |
| <b>Fig. S3</b> PXRD patterns of PMo <sub>12</sub> , TpPa-1 and PMo <sub>12</sub> @TpPa-1. ....                                                                                                                                                                         | 5  |
| <b>Fig. S4</b> IR spectra of monomer, TpPa-1, PMo <sub>12</sub> @TpPa-1 and PMo <sub>12</sub> .....                                                                                                                                                                    | 5  |
| <b>Fig. S5</b> IR spectra of monomer, TpPa-1, PMo <sub>12</sub> @TpPa-1 and PMo <sub>12</sub> in CYH and DCM.....                                                                                                                                                      | 6  |
| <b>Fig. S6</b> TGA of TpPa-1, PMo <sub>12</sub> @TpPa-1 and PMo <sub>12</sub> . ....                                                                                                                                                                                   | 6  |
| <b>Fig. S7</b> TGA of TpPa-1, SiW <sub>12</sub> @TpPa-1 and PMo <sub>12</sub> . ....                                                                                                                                                                                   | 7  |
| <b>Fig. S8</b> N <sub>2</sub> sorption isotherms of TpPa-1 and different PMo <sub>12</sub> added amounts of PMo <sub>12</sub> @TpPa-1 measured at 77 K. ....                                                                                                           | 7  |
| <b>Fig. S9</b> The pore size distribution of TpPa-1 and PMo <sub>12</sub> (25%)@TpPa-1. ....                                                                                                                                                                           | 8  |
| <b>Fig. S10</b> The pore size distribution of TpPa-1 and PW <sub>12</sub> (27%)@TpPa-1.....                                                                                                                                                                            | 8  |
| <b>Fig. S11</b> (a) SEM characterization of TpPa-1; (b) SEM characterization of PW <sub>12</sub> @TpPa-1. ....                                                                                                                                                         | 8  |
| <b>Fig. S12</b> (a-d) TEM characterization of PW <sub>12</sub> (22%)TpPa-1; (e-h) TEM characterization of PW <sub>12</sub> (32%)TpPa-1; (i-m) EDS characterization of PW <sub>12</sub> (22%)@TpPa-1; (n-r) EDS characterization of PW <sub>12</sub> (32%)@TpPa-1. .... | 9  |
| <b>Fig. S13</b> FT-IR spectra of PW <sub>12</sub> (27%)@TpPa-1 before and after three runs catalytic reactions in the characteristic regions. ....                                                                                                                     | 10 |
| <b>Fig. S14</b> Reaction rate plots for MPS using PW <sub>12</sub> (27%)@TpPa-1 as the catalyst. ....                                                                                                                                                                  | 10 |
| <b>Fig. S15</b> PXRD spectra of PW <sub>12</sub> (27%)@TpPa-1 before and after cycle catalytic reactions. ....                                                                                                                                                         | 11 |
| <b>Fig. S16</b> Hot filtration of PW <sub>12</sub> (27%)@TpPa-1 in the oxidation of MPS. ....                                                                                                                                                                          | 11 |
| <b>Fig. S17</b> Raman spectra of PW <sub>12</sub> (27%)@TpPa-1 before and after treating with H <sub>2</sub> O <sub>2</sub> . ....                                                                                                                                     | 12 |
| <b>Table S1</b> Physicochemical properties of PW <sub>12</sub> @TpPa-1 composites.....                                                                                                                                                                                 | 12 |
| <b>Table S2</b> Comparison with other reported catalysts for MPS oxidation. ....                                                                                                                                                                                       | 12 |
| <b>Table S3</b> The oxidation of MPS using different catalystsa. ....                                                                                                                                                                                                  | 13 |
| <b>Table S4</b> Selective oxidation of various sulfides to sulfoxide <sup>a</sup> . ....                                                                                                                                                                               | 13 |

## Experimental section

### Materials and methods

1, 3, 5-triformylphloroglucinol (Tp), p-phenylenediamine (Pa-1) were purchased from Jilin Research and Extension Technology Company. Keggin-type  $\text{H}_3\text{PMo}_{12}\text{O}_{40}$  ( $\text{PMo}_{12}$ ),  $\text{H}_3\text{PW}_{12}\text{O}_{40}$  ( $\text{PW}_{12}$ ),  $\text{H}_3\text{SiW}_{12}\text{O}_{40}$  ( $\text{SiW}_{12}$ ), mesitylene, 1,4-dioxane were all purchased by Aladdin Reagents. Powder X-ray diffraction (PXRD) patterns of the samples were measured by a D/teX Ultra diffractometer with Cu  $K\alpha$  radiation ( $\lambda = 1.5418 \text{ \AA}$ ). FT-IR spectra were carried out on a Perkin Elmer Spectrum. Thermogravimetric analyses were conducted using a Hitachi TG/DTA7200 analyzer in an  $\text{N}_2$ -flow atmosphere with a heating rate of  $10 \text{ }^\circ\text{C}/\text{min}$  at a temperature of  $25\text{--}800 \text{ }^\circ\text{C}$ . Scanning electron microscope images (SEM) and energy-dispersive spectroscopy (EDS) were conducted on a cold field-emission scanning electron microscope (S-4800). Transmission electron microscope (TEM) (JEOL JEM-2100F, 200 kV) equipped with EDS (X-MaxN 80T IE250). The planetary ball mill (QM-3SP04) is from Nanjing Nanda Instrument Company. The catalytic reaction was analyzed by using a Shimadzu Tech-comp GC-7900 gas chromatograph (GC) with a flame ionization detector equipped with a TM-5 Sil capillary column.

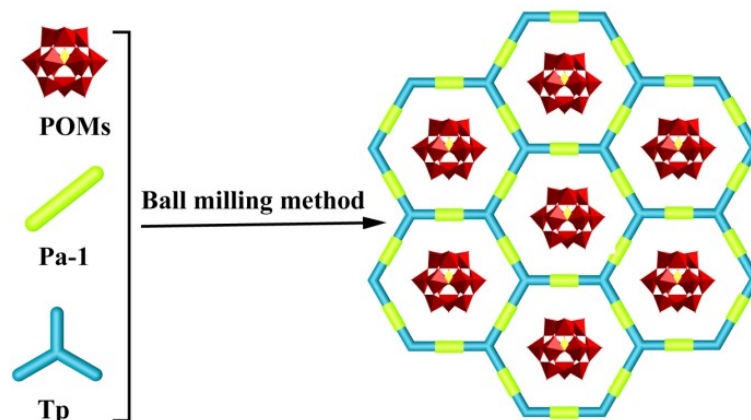

Fig. S1 Schematic illustration for the syntheses of POMs@TpPa-1.

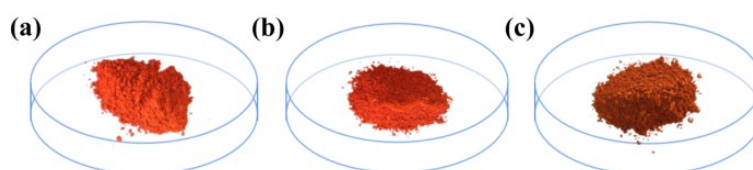

Fig. S2 (a) The pictures of TpPa-1; (b)  $\text{PW}_{12}@TpPa-1$ ; (c)  $\text{PMo}_{12}@TpPa-1$ .

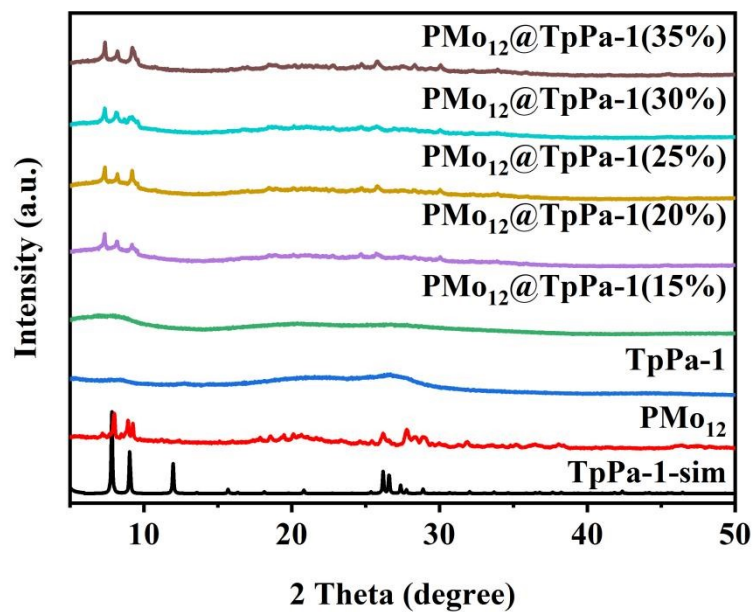

Fig. S3 PXRD patterns of PMo<sub>12</sub>, TpPa-1 and PMo<sub>12</sub>@TpPa-1.

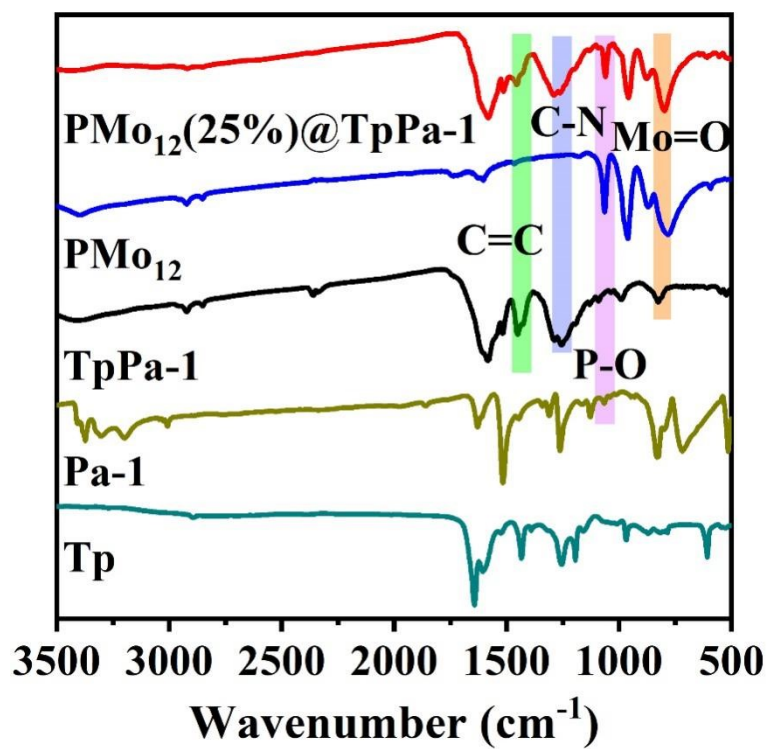

Fig. S4 IR spectra of monomer, TpPa-1, PMo<sub>12</sub>@TpPa-1 and PMo<sub>12</sub>.

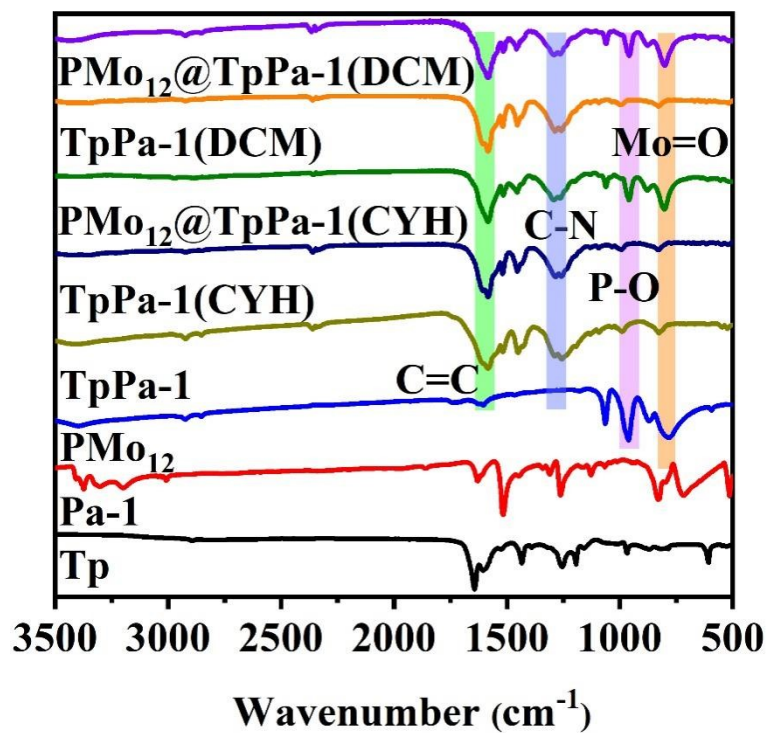

Fig. S5 IR spectra of monomer,  $TpPa-1$ ,  $\text{PMo}_{12}@TpPa-1$  and  $\text{PMo}_{12}$  in CYH and DCM.

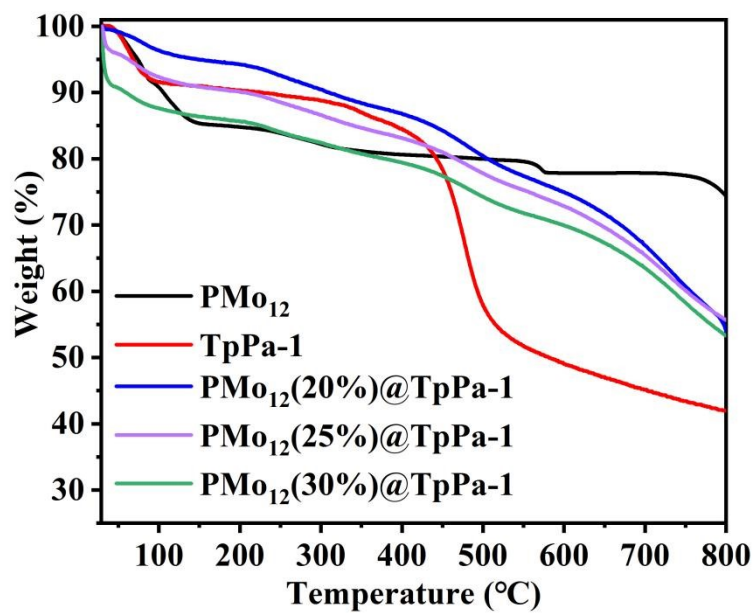

Fig. S6 TGA of  $TpPa-1$ ,  $\text{PMo}_{12}@TpPa-1$  and  $\text{PMo}_{12}$ .

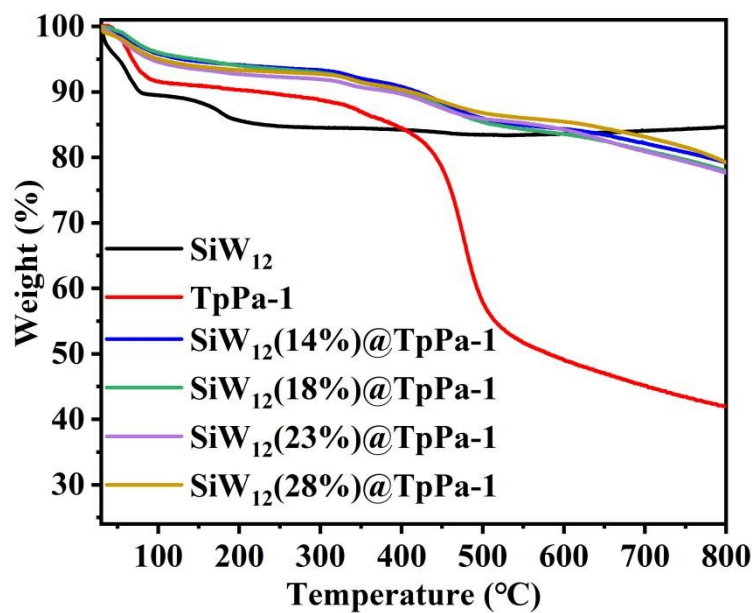

Fig. S7 TGA of TpPa-1, SiW<sub>12</sub>@TpPa-1 and PMo<sub>12</sub>.

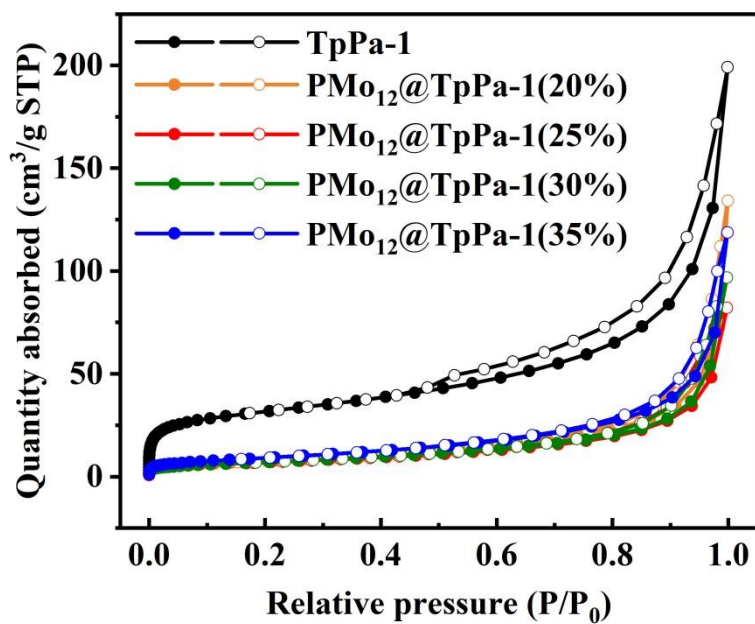

Fig. S8 N<sub>2</sub> sorption isotherms of TpPa-1 and different PMo<sub>12</sub> added amounts of PMo<sub>12</sub>@TpPa-1 measured at 77 K.

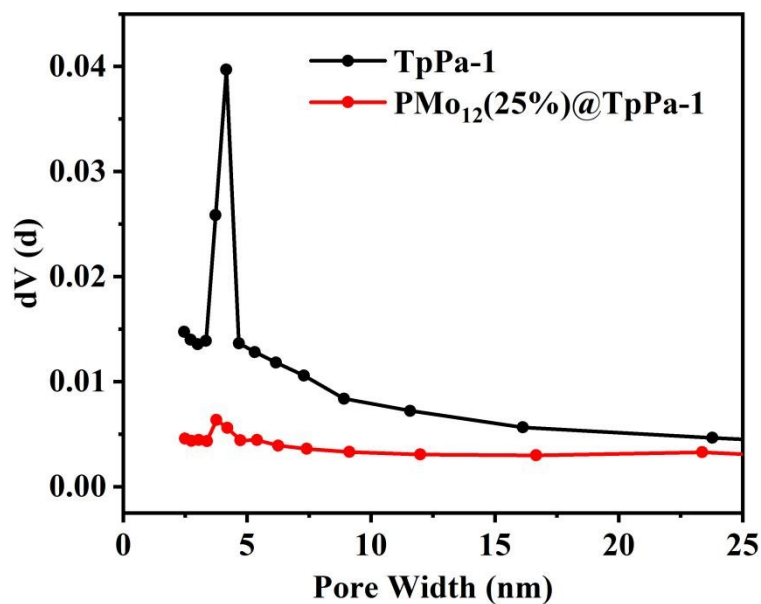

Fig. S9 The pore size distribution of TpPa-1 and PMo<sub>12</sub>(25%)@TpPa-1.

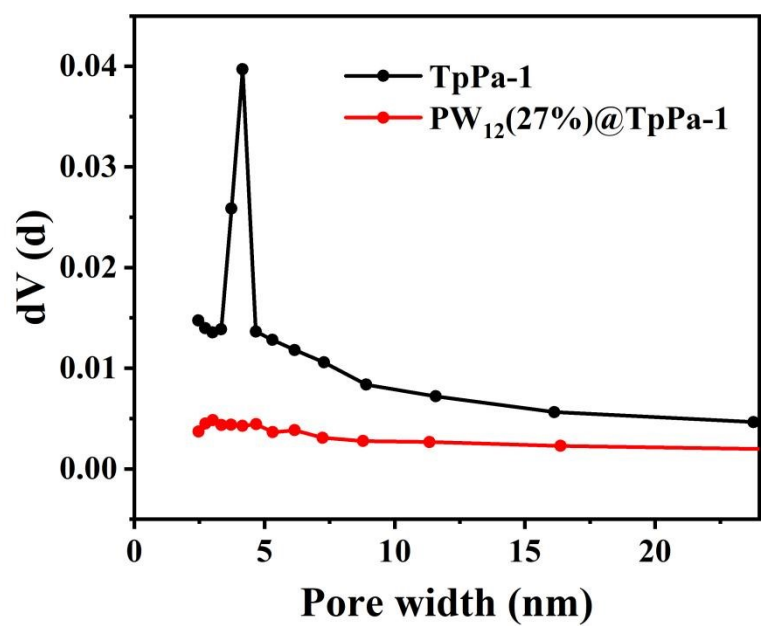

Fig. S10 The pore size distribution of TpPa-1 and PW<sub>12</sub>(27%)@TpPa-1.

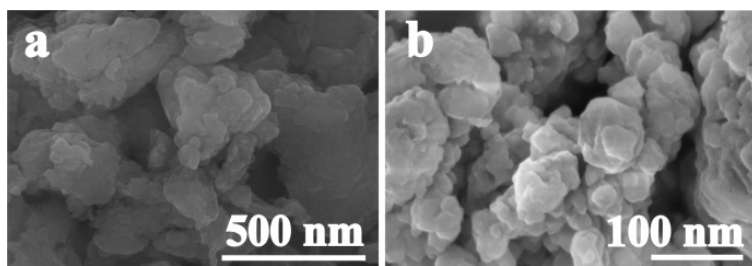

Fig. S11 (a) SEM characterization of TpPa-1; (b) SEM characterization of PW<sub>12</sub>@TpPa-1.

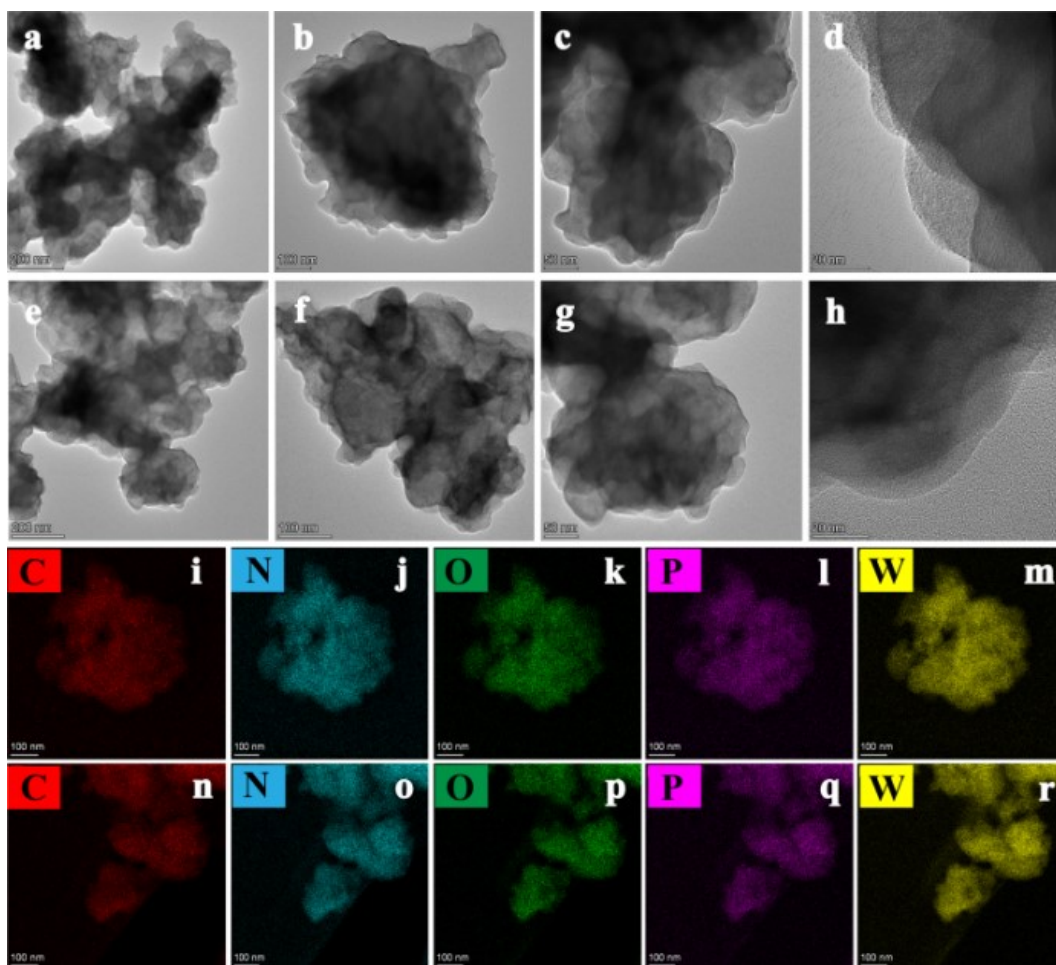

**Fig. S12** (a–d) TEM characterization of PW<sub>12</sub>(22%)TpPa-1; (e–h) TEM characterization of PW<sub>12</sub>(32%)TpPa-1; (i–m) EDS characterization of PW<sub>12</sub>(22%)@TpPa-1; (n–r) EDS characterization of PW<sub>12</sub>(32%)@TpPa-1.



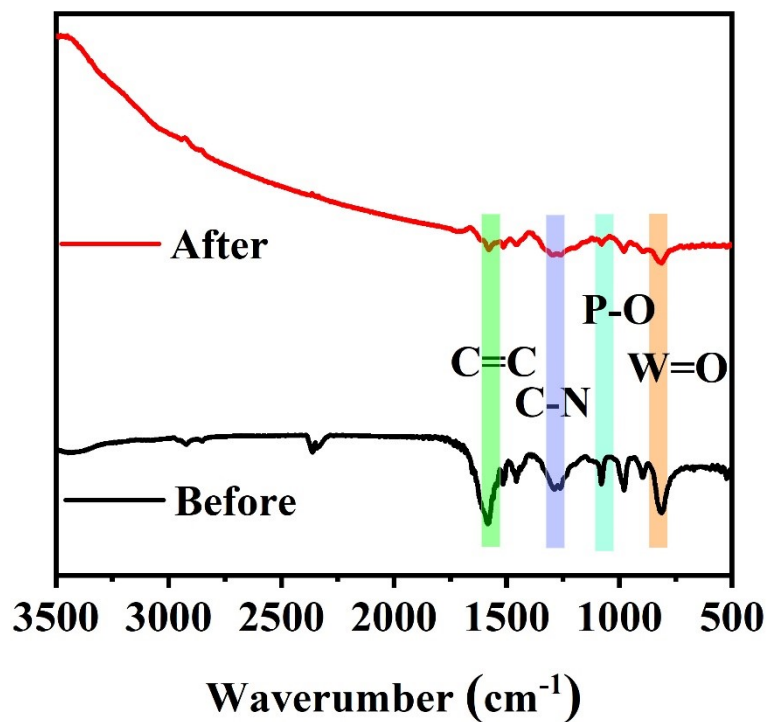

Fig. S13 FT-IR spectra of  $\text{PW}_{12}(27\%)\text{@TpPa-1}$  before and after three runs catalytic reactions in the characteristic regions.

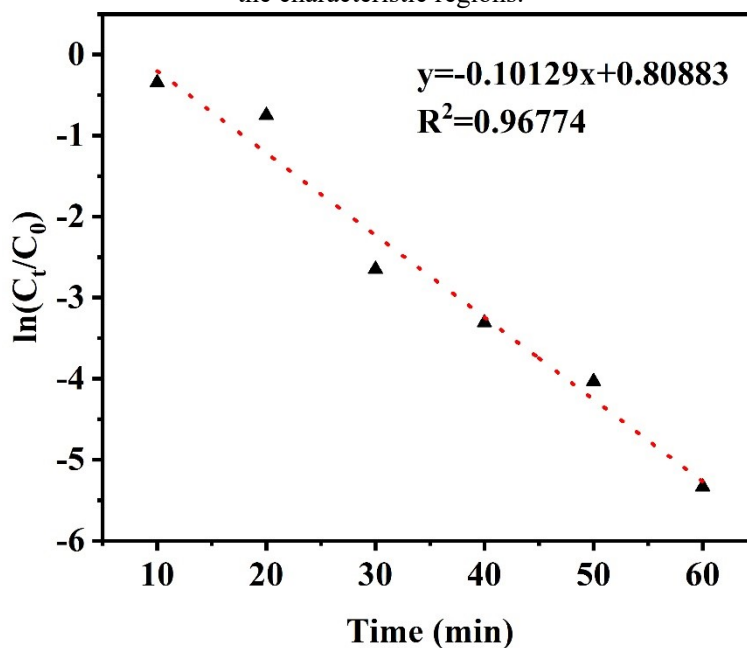

Fig. S14 Reaction rate plots for MPS using  $\text{PW}_{12}(27\%)\text{@TpPa-1}$  as the catalyst.

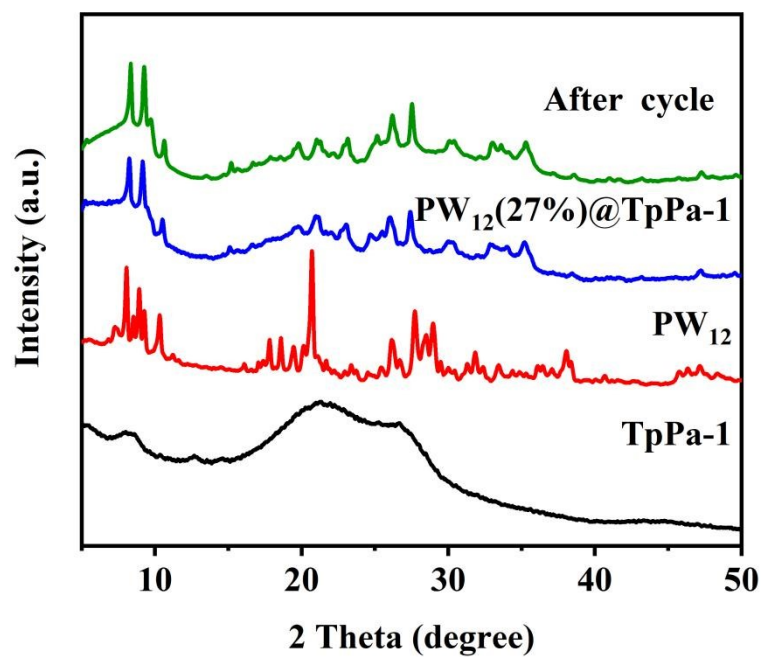

Fig. S15 PXRD spectra of  $\text{PW}_{12}(27\%)\text{@TpPa-1}$  before and after cycle catalytic reactions.

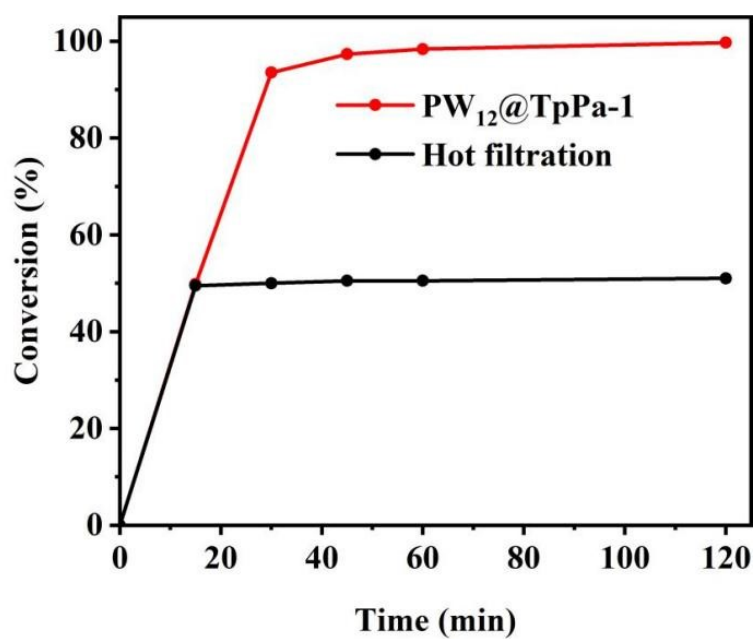

Fig. S16 Hot filtration of  $\text{PW}_{12}(27\%)\text{@TpPa-1}$  in the oxidation of MPS.

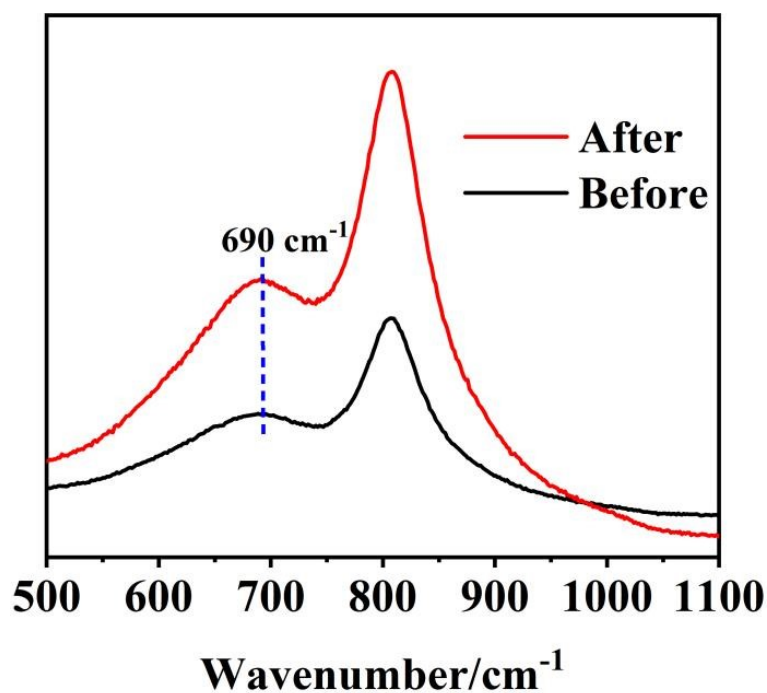

Fig. S17 Raman spectra of  $\text{PW}_{12}(27\%)@TpPa-1$  before and after treating with  $\text{H}_2\text{O}_2$ .

Table S1 Physicochemical properties of  $\text{PW}_{12}@TpPa-1$  composites.

| Composites                     | $S_{\text{BET}}$ ( $\text{m}^2/\text{g}$ ) | $V_{\text{total}}$ ( $\text{cc}/\text{g}$ ) | Average pore size (nm) |
|--------------------------------|--------------------------------------------|---------------------------------------------|------------------------|
| TpPa-1                         | 91.81                                      | 0.28                                        | 6.16                   |
| $\text{PW}_{12}(22\%)@TpPa-1$  | 11.41                                      | 0.11                                        | 19.95                  |
| $\text{PW}_{12}(27\%)@TpPa-1$  | 21.52                                      | 0.10                                        | 8.84                   |
| $\text{PW}_{12}(32\%)@TpPa-1$  | 9.60                                       | 0.08                                        | 17.42                  |
| $\text{PMo}_{12}(20\%)@TpPa-1$ | 28.39                                      | 0.21                                        | 14.61                  |
| $\text{PMo}_{12}(25\%)@TpPa-1$ | 25.22                                      | 0.13                                        | 10.1                   |
| $\text{PMo}_{12}(30\%)@TpPa-1$ | 26.05                                      | 0.15                                        | 11.5                   |

Table S2 Comparison with other reported catalysts for MPS oxidation.

| Cat.                                                                                                                                                                                                                                                                       | Temp. ( $^{\circ}\text{C}$ ) | Time (min) | Conv. (%)   | Sel. (%)   | Ref              |
|----------------------------------------------------------------------------------------------------------------------------------------------------------------------------------------------------------------------------------------------------------------------------|------------------------------|------------|-------------|------------|------------------|
| <b><math>\text{PW}_{12}@TpPa-1</math></b>                                                                                                                                                                                                                                  | <b>60</b>                    | <b>60</b>  | <b>99.5</b> | <b>100</b> | <b>This work</b> |
| $(\text{Hbiz})_{12}[(\text{P}_2\text{Co}_2\text{Mo}^{\text{V}}_4\text{O}_8)_2(\text{P}_2\text{Mo}^{\text{V}}_2\text{O}_8)_4(\text{Pb}\text{C}\text{P}_6\text{Co}_2\text{Mo}^{\text{V}}_2\text{Mo}^{\text{VI}}_{14}\text{O}_{73})_4] \cdot \text{ca.}129\text{H}_2\text{O}$ | 60                           | 80         | 99.1        | 98.7       | 1                |
| VO-TAPT-2,3-DHTA COFs                                                                                                                                                                                                                                                      | 25                           | 240        | 93.0        | 90.0       | 2                |
| $\text{KTaxTi}_{1-x}\text{O}_3$                                                                                                                                                                                                                                            | 60                           | 240        | 87.0        | 80.0       | 3                |
| Ag-DTMH                                                                                                                                                                                                                                                                    | 50                           | 120        | 99.0        | 94.0       | 4                |
| Ni-DTMH                                                                                                                                                                                                                                                                    | 40                           | 180        | 96.0        | 63.0       | 4                |
| Co-DTMH                                                                                                                                                                                                                                                                    | 40                           | 180        | 31.0        | 99.0       | 4                |
| V/MCM-41                                                                                                                                                                                                                                                                   | 25                           | 360        | 80.0        | 93.0       | 5                |

**Table S3** The oxidation of MPS using different catalystsa.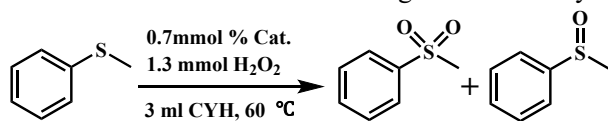

| Entry | Catalyst                                   | System        | Conv. (%)   | Sel. <sup>b</sup> (%) |
|-------|--------------------------------------------|---------------|-------------|-----------------------|
| 1     | PW <sub>12</sub> (22%)@TpPa-1              | Heterogeneous | 92.3        | 87.0                  |
| 2     | PW <sub>12</sub> (32%)@TpPa-1              | Heterogeneous | 95.2        | 97.8                  |
| 3     | PW <sub>12</sub> (37%)@TpPa-1              | Heterogeneous | 89.4        | 97.0                  |
| 4     | <sup>d</sup> PW <sub>12</sub> (27%)@TpPa-1 | Heterogeneous | 92.0        | 99.1                  |
| 5     | <sup>e</sup> PW <sub>12</sub> (27%)@TpPa-1 | Heterogeneous | 93.5        | 94.8                  |
| 6     | <sup>f</sup> PW <sub>12</sub> (27%)@TpPa-1 | Heterogeneous | <b>99.5</b> | <b>100</b>            |
| 7     | <sup>g</sup> PW <sub>12</sub> (27%)@TpPa-1 | Heterogeneous | 92.4        | 98.3                  |
| 8     | <sup>h</sup> PW <sub>12</sub> (27%)@TpPa-1 | Heterogeneous | 83.1        | 89.0                  |
| 9     | PMo <sub>12</sub> (20%)@TpPa-1             | Heterogeneous | 74.5        | 77.0                  |
| 10    | PMo <sub>12</sub> (30%)@TpPa-1             | Heterogeneous | 86.6        | 86.5                  |
| 11    | SiW <sub>12</sub> (14%)@TpPa-1             | Heterogeneous | 76.0        | 44.4                  |
| 12    | SiW <sub>12</sub> (18%)@TpPa-1             | Heterogeneous | 89.4        | 81.5                  |
| 13    | SiW <sub>12</sub> (23%)@TpPa-1             | Heterogeneous | 85.5        | 68.4                  |
| 14    | SiW <sub>12</sub> (28%)@TpPa-1             | Heterogeneous | 69.0        | 60.0                  |

<sup>a</sup>Reaction conditions: 0.5 mmol MPS; 0.7 mmol% catalyst; 3 mL CYH; 1.3 mmol H<sub>2</sub>O<sub>2</sub>; 60 °C; 60 min. <sup>b</sup>Selectivity to sulfone, the byproduct was sulphones. <sup>c</sup>Selectivity to sulfoxides, the byproduct was sulphones. <sup>d-h</sup>The amount of catalyst added was 0.5 mmol%, 0.6 mmol%, 0.7 mmol%, 0.8 mmol%, and 0.9 mmol% respectively.

**Table S4** Selective oxidation of various sulfides to sulfoxide<sup>a</sup>.

| Entry | Substrate | Temp. (°C) | Time (min) | Conv. (%) | Sel. <sup>b</sup> (%) |
|-------|-----------|------------|------------|-----------|-----------------------|
| 1     |           | 60         | 60         | 99.0      | 99.0                  |
| 2     |           | 60         | 60         | 97.0      | 98.0                  |
| 3     |           | 60         | 60         | 85.2      | 92.7                  |
| 4     |           | 60         | 60         | 97.8      | 98.2                  |

|   |                                                                                   |    |    |       |      |
|---|-----------------------------------------------------------------------------------|----|----|-------|------|
| 5 |  | 60 | 60 | 84.06 | 99.0 |
| 6 |  | 60 | 60 | 88.8  | 59.3 |

<sup>a</sup>Reaction conditions: 0.5 mmol sulfide; 0.7 mmol% catalyst; 3 mL CYH; 1.3 mmol H<sub>2</sub>O<sub>2</sub>; 60 °C; 60 min. <sup>b</sup>Selectivity to sulfone, the byproduct was sulfoxides.

## references

1. X. Liu, N. Xu, X. Liu, Y. Guo, X. Wang, *Chem Commun (Camb)*, 2022, **58**, 12236-12239.
2. H. Vardhan, G. Verma, S. Ramani, A. Nafady, A. M. Al-Enizi, Y. Pan, Z. Yang, H. Yang, S. Ma, *ACS Appl Mater Inter.*, 2019, **11**, 3070–3079.
3. C. Leal Marchena, G. Pecchi, L. Pierella, *Molecular Catalysis.*, 2020, **482**.
4. X. Huang, X. Gu, Y. Qi, Y. Zhang, G. Shen, B. Yang, W. Duan, S. Gong, Z. Xue, Y. Chen, *Chin. J. Chem.*, 2021, **39**, 2495-2503.
5. T. Ben Zida, I. Khedhera, J.M. Fraileb. *Journal of Chemical Research.*, 2013, **37(12)**, 766-773.
